# Supplementary material for: Warmer Temperature and Spatiotemporal Dynamics during Primary Succession on Tropical Coastal Dunes
Source: MDPI journal article supplement (doi:10.3390/plants11223029), 2022-11-09
Supplement: s1 [file s1]

# Supplementary Materials:

S1. Supplementary material 1. Results from the Principal Components Analyses, showing eigenvalues, variance percentages, and species loadings on the first two principal components. The species with the highest loadings are also highly correlated with the corresponding component (shown in boldface).

|                                                                 | Axis 1                | Axis 2        |                      |        |
|-----------------------------------------------------------------|-----------------------|---------------|----------------------|--------|
| Eigenvalues                                                     | 11.715                | 5.347         |                      |        |
| Percentage                                                      | 35.501                | 16.203        |                      |        |
| Cum. Percentage                                                 | 35.501                | 51.703        |                      |        |
|                                                                 | PCA variable loadings |               | Pearson correlations |        |
|                                                                 | Axis 1                | Axis 2        | Axis 1               | Axis 2 |
| Cha cha                                                         | <b>0.126</b>          | 0.049         | 0.429                | 0.116  |
| Cyp art                                                         | <b>0.131</b>          | 0.037         | 0.448                | 0.086  |
| Cro pun                                                         | <b>0.208</b>          | 0.034         | 0.711                | 0.077  |
| Pal lin                                                         | <b>0.238</b>          | 0.02          | 0.811                | 0.043  |
| Pap sp                                                          | <b>0.127</b>          | 0.013         | 0.436                | 0.032  |
| Ari ads                                                         | -0.127                | 0.034         | -0.426               | 0.082  |
| Bid pil                                                         | <b>-0.202</b>         | 0.005         | -0.694               | 0.013  |
| Bou rep                                                         | -0.189                | -0.151        | -0.647               | -0.349 |
| Cen vir                                                         | -0.217                | <b>0.251</b>  | -0.747               | 0.577  |
| Cni tex                                                         | -0.142                | 0.215         | -0.485               | 0.499  |
| Com ere                                                         | -0.196                | <b>0.273</b>  | -0.669               | 0.632  |
| Eup dio                                                         | -0.022                | -0.174        | -0.079               | -0.405 |
| Mac atr                                                         | <b>-0.236</b>         | 0.08          | -0.81                | 0.187  |
| Met pri                                                         | <b>-0.213</b>         | 0.204         | -0.727               | 0.474  |
| Pec sat                                                         | <b>-0.272</b>         | -0.015        | -0.932               | -0.029 |
| Tri pur                                                         | -0.153                | <b>0.259</b>  | -0.525               | 0.598  |
| Por num                                                         | -0.144                | <b>0.207</b>  | -0.492               | 0.483  |
| Rhy sp                                                          | -0.123                | -0.328        | -0.422               | -0.755 |
| Sch sco                                                         | <b>-0.273</b>         | 0.016         | -0.936               | 0.037  |
| Tra plu                                                         | -0.131                | 0.042         | -0.453               | 0.094  |
| Wal ind                                                         | <b>-0.265</b>         | -0.001        | -0.906               | -0.004 |
| Amp pan                                                         | -0.103                | -0.065        | -0.354               | -0.151 |
| Car hal                                                         | -0.159                | <b>0.271</b>  | -0.54                | 0.624  |
| Cro inc                                                         | -0.175                | <b>-0.313</b> | -0.598               | -0.724 |
| Flo lie                                                         | -0.152                | <b>-0.342</b> | -0.524               | -0.797 |
| Ire cel                                                         | -0.046                | -0.03         | -0.157               | -0.07  |
| Mim cha                                                         | 0.061                 | 0.004         | 0.209                | 0.009  |
| Pas sp                                                          | 0.008                 | -0.022        | 0.025                | -0.05  |
| Tec sta                                                         | -0.102                | <b>-0.234</b> | -0.35                | -0.542 |
| Tri inu                                                         | -0.142                | <b>-0.318</b> | -0.483               | -0.731 |
| Vit sp                                                          | -0.173                | 0.074         | -0.593               | 0.172  |
| Opu str                                                         | <b>-0.251</b>         | -0.165        | -0.859               | -0.377 |
| Ran lae                                                         | -0.19                 | -0.079        | -0.656               | -0.186 |
| Bartlett's test sphericity $\chi^2= 13031$ , df= 528, $p<0.000$ |                       |               |                      |        |
